# Supplementary material for: Predicting Success in Percutaneous Transhepatic Biliary Drainage
Source: Springer Nature journal article supplement (doi:10.1007/s00270-017-1679-0), 2017-05-12

**Supplemental materials**

The mean vector and the covariance matrix of the assigned log-normal distribution was estimated from the study cohort as

10000 random draws were made from this log-normal distribution.

Total bilirubin has the largest impact on the outcome post total bilirubin (range, 0.05 – 104.9 mg/dL); variation in INR causes moderate change in post total bilirubin (range, 1.34 – 7.92 mg/dL); ALT has the least effect on the outcome (range, 1.35 – 5.87 mg/dL).


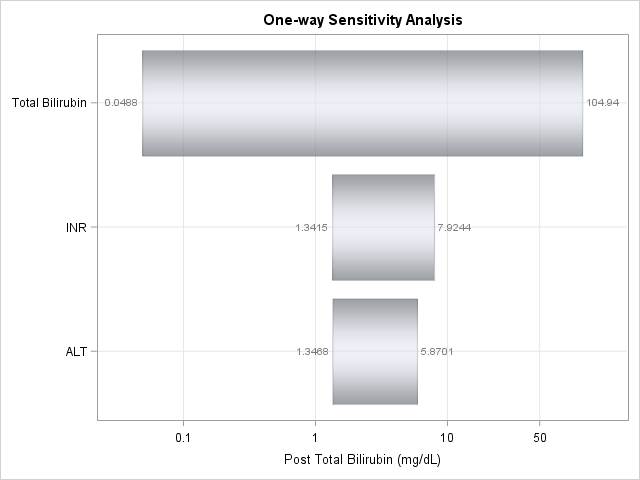

Supplement: MOESM1 [file 12284954]
